# Supplementary material for: Dengue virus-free defective interfering particles have potent and broad anti-dengue virus activity
Source: PubMed Central journal article supplement (PMC8113447; doi:10.1038/s42003-021-02064-7), 2021-05-11
Supplement: 42003_2021_2064_MOESM2_ESM.pdf [file 42003_2021_2064_MOESM2_ESM.pdf]

## **Description of Additional Supplementary Files**

**File Name:** Supplementary Data 1

**Description:** All source data used underlying each figure
